# Supplementary material for: Low power highly flexible BiFeO3-based resistive random access memory (RRAM) with the coexistence of negative differential resistance (NDR)
Source: Royal Society of Chemistry journal article supplement (doi:10.1039/d3cp02235h), 2023-01-01
Supplement: d3cp02235h1.pdf [file d3cp02235h1.pdf]

## Low Power Highly Flexible BiFeO<sub>3</sub> based Resistive Random-Access Memory (RRAM) with Coexistence of Negative Differential Resistance (NDR)

Chandra Prakash, Ankit K. Yadav, Ambesh Dixit\*  
Advance Materials and Device (A-MAD) Laboratory, Department of Physics, IIT Jodhpur,  
Rajasthan, India, 342030  
[\\*ambesh@iitj.ac.in](mailto:*ambesh@iitj.ac.in)

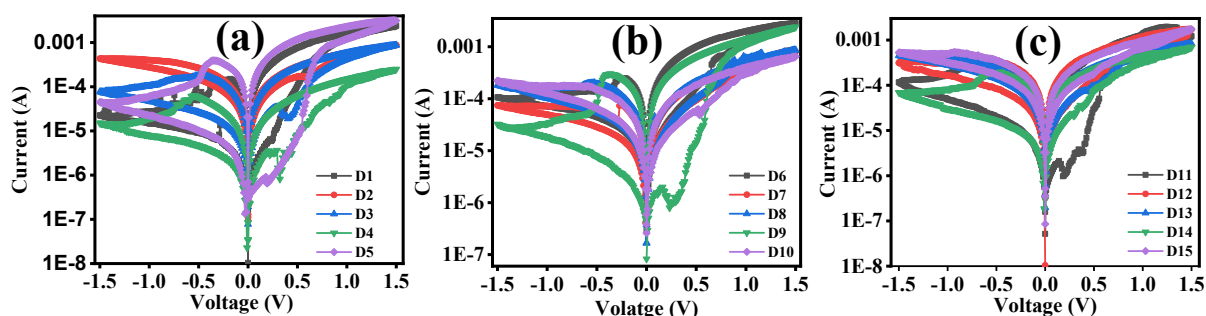

**Figure S1:** Device-to-device semi-logarithmic current-voltage plots for Cu/BFO/PMMA/ITO/PET (a) device 1-5, (b) device 6-10, and (c) device 11-15.

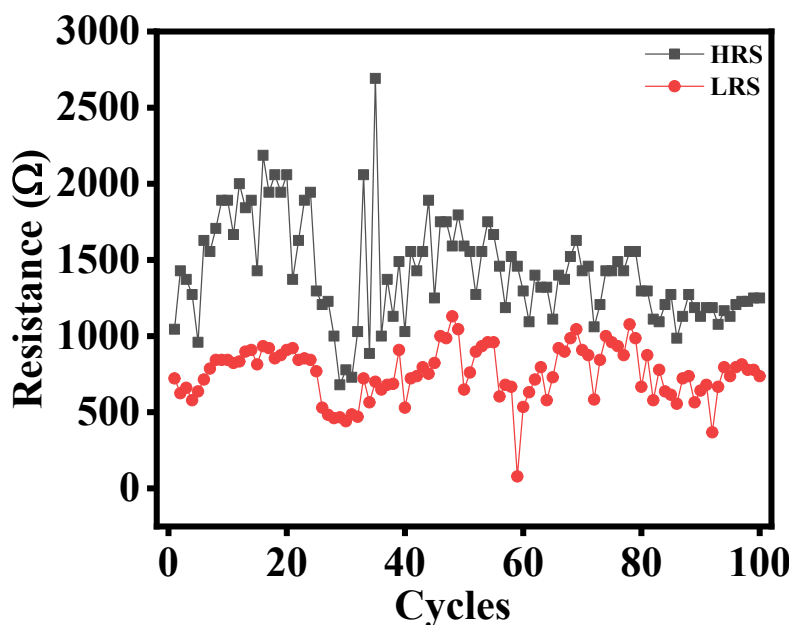

**Figure S2:** Endurance measurement of Cu/BFO/PMMA/ITO/PET for  $10^2$  cycles at 0.7 V.

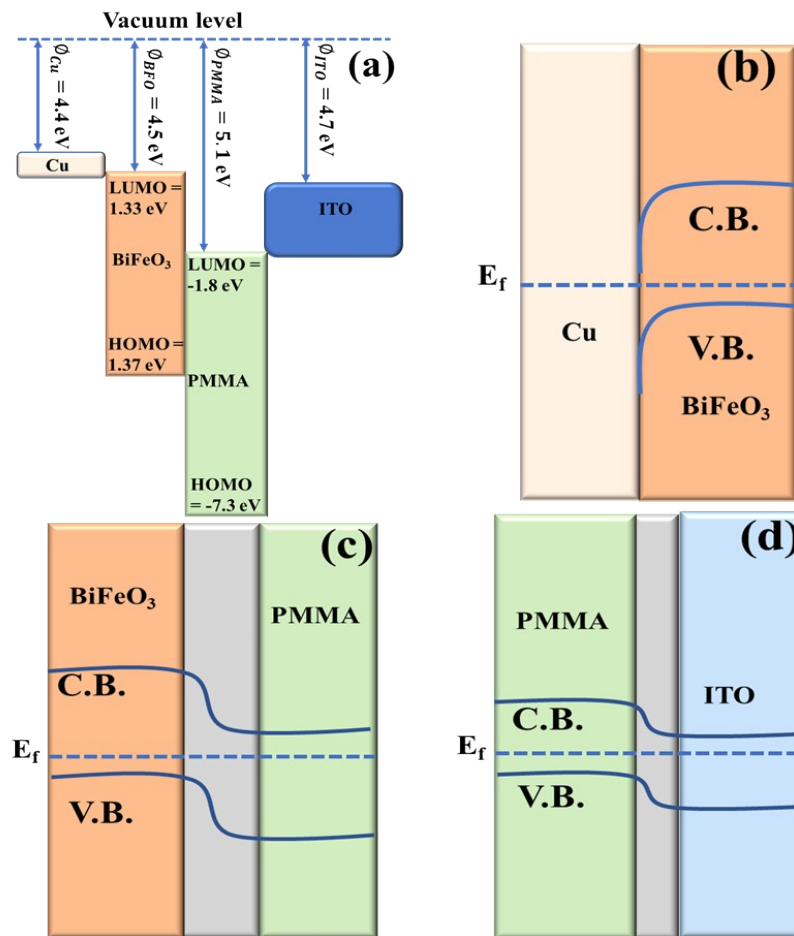

**Figure S3.** Band alignment of Cu/BFO/PMMA/ITO/PET sheet at different interfaces, (a) non-equilibrium band position, (b) Cu/BFO interface, (c) BiFeO<sub>3</sub>/PMMA, (d) PMMA/ITO

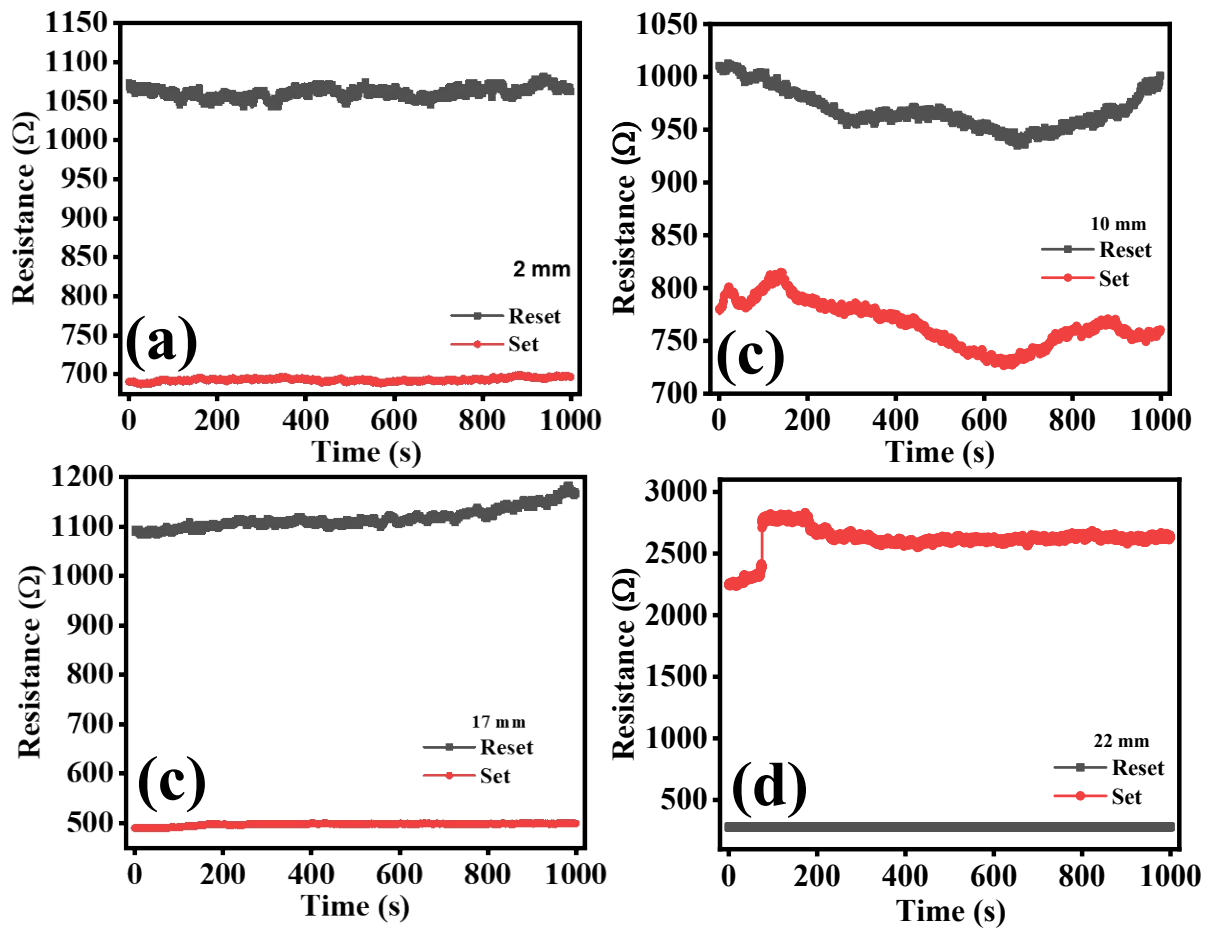

**Figure S4:** Retention measurement of Cu/BFO/PMMA/ITO/PET for  $10^3$  seconds for a bending of (a) 2 mm, (b) 10 mm, (c) 17 mm, and (d) 22 mm.

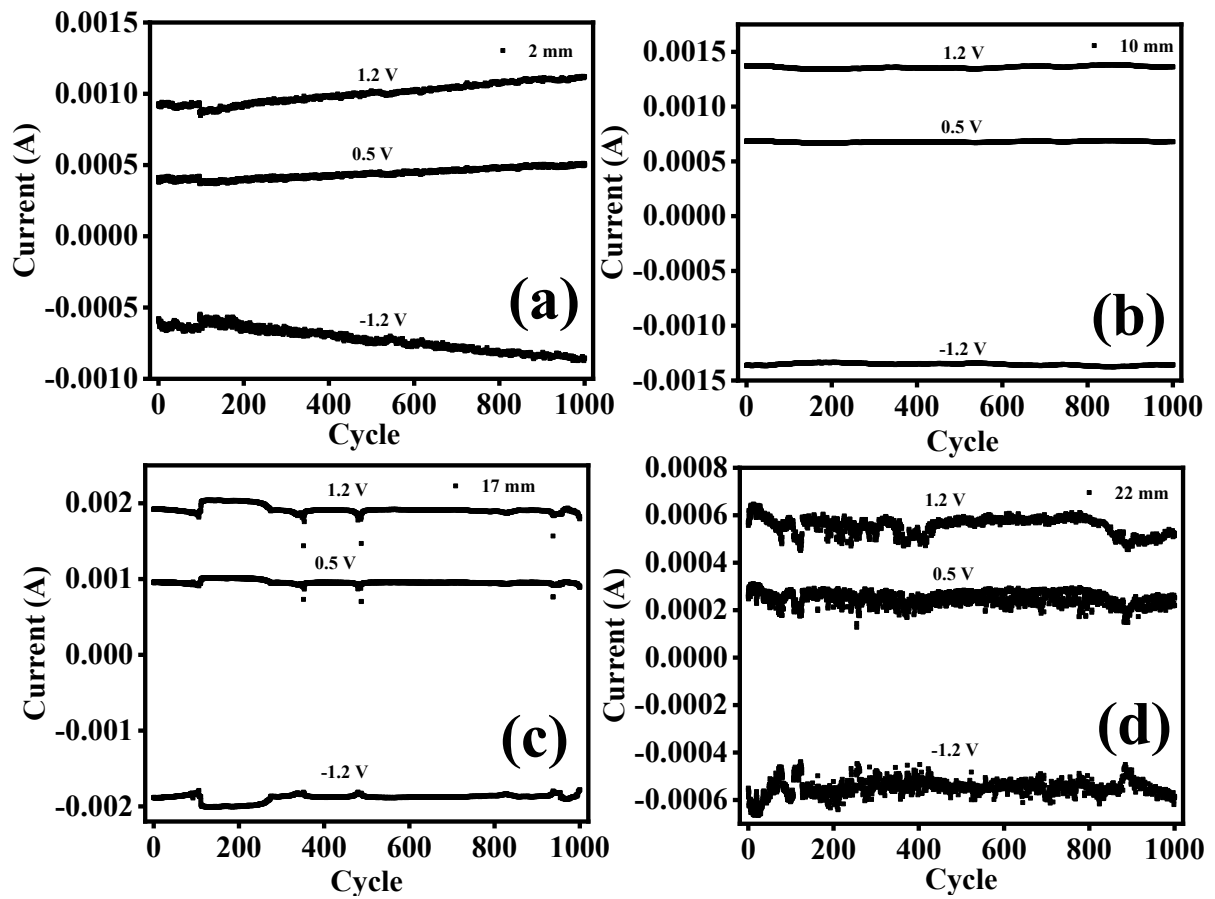

**Figure S5:** Endurance measurement of Cu/BFO/PMMA/ITO/PET for  $10^3$  seconds with bending of (a) 2 mm, (b) 10 mm, (c) 17 mm, and (d) 22 mm at Write-read-erase-read voltage of  $1.2\text{ V} \rightarrow 0.5\text{ V} \rightarrow -1.2\text{ V} \rightarrow 0.5\text{ V}$  with pulse duration of 100 ms.

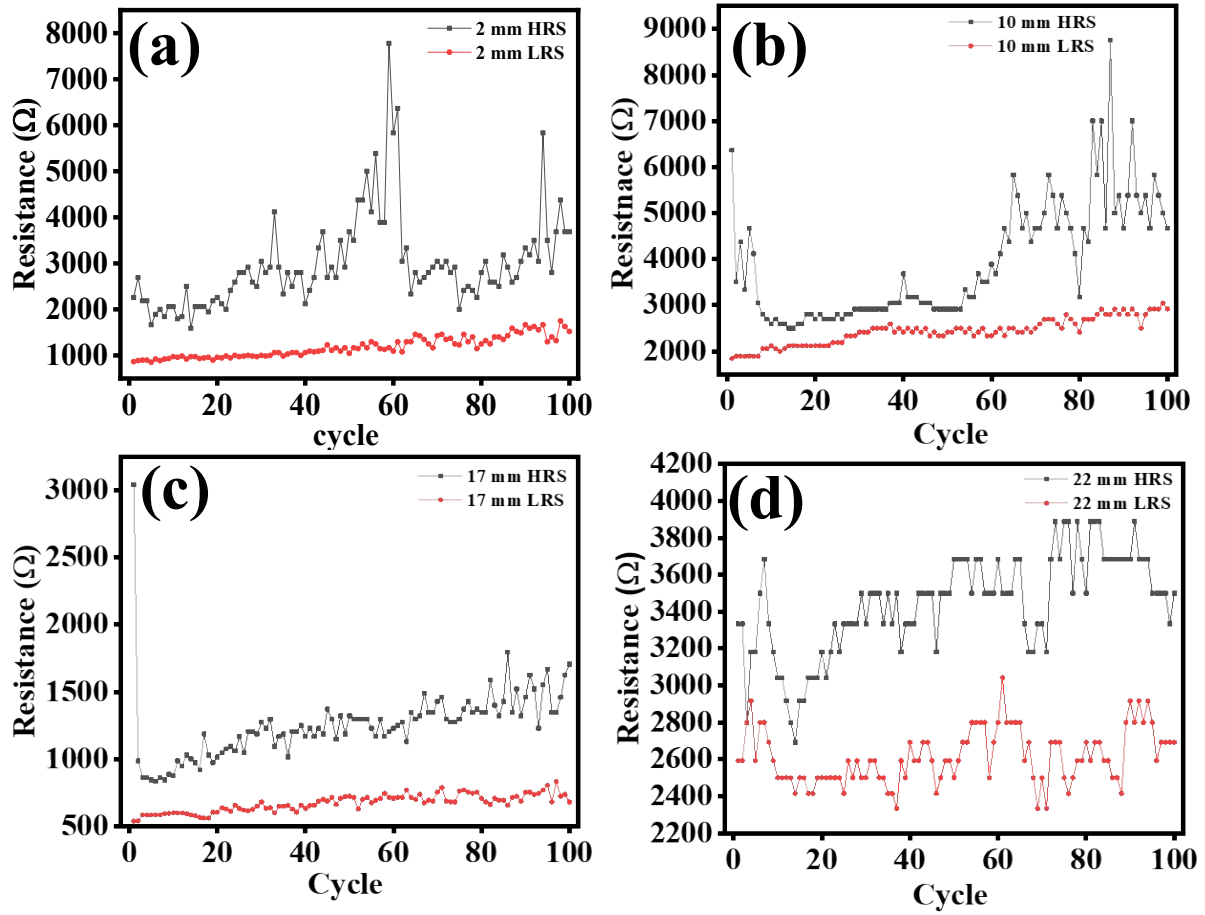

**Figure S6:** Endurance measurements of Cu/BFO/PMMA/ITO/PET till  $10^2$  cycles for different bends of (a) 2 mm, (b) 10 mm, (c) 17 mm, and (d) 22 mm at 0.7 V.
